# Supplementary material for: Design and Synthesis of a Dinuclear Copper(II) Probe for Selective Fluorescence Sensing of Pyrophosphate
Source: Hindawi journal article supplement (doi:10.1155/2019/5349124), 2019-02-28
Supplement: f1 [file 5349124.f1.pdf]

## Supplementary Material

### Design and Synthesis of a Dinuclear Copper(II) Probe for Selective Fluorescence Sensing of Pyrophosphate

Jinhe Xu<sup>a,§</sup>, Jing Li<sup>a,§</sup>, Chenxi Liu<sup>a</sup>, Linlin Yang<sup>a</sup>, Guangjie He<sup>a,\*</sup>, Tianjun Ni<sup>b,\*</sup>, Aiyong Fan<sup>a</sup>,  
Songjun Wang<sup>c</sup>, Qingzhi Wang<sup>a,\*</sup>

<sup>a</sup>Xinxiang Key Laboratory of Forensic Science Evidence, School of Forensic Medicine, Xinxiang Medical University, Jinsui Road No. 601, Xinxiang, 453003, Henan Province, P. R. China

<sup>b</sup>School of Basic Medical Science, Xinxiang Medical University, Jinsui Road No. 601, Xinxiang, 453003, Henan Province, P. R. China

<sup>c</sup>Hebei Key Laboratory of Forensic Medicine, Hebei Medical University, East Zhongshan Road No. 361, Shijiazhuang, 050017, Hebei Province, P. R. China

\*Corresponding author: Tel./Fax: +86-373-3831183; +86-373-3831065

E-mail: guangjiehe@163.com; tjni@xxmu.edu.cn; wqzmgl@126.com

§These authors contributed equally to this work

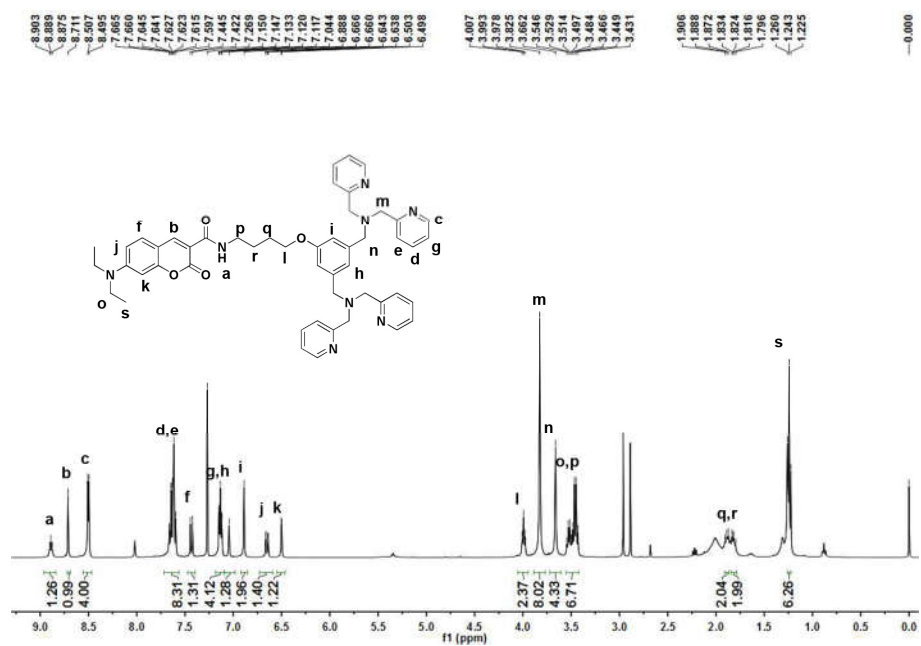

Figure S1. <sup>1</sup>H NMR of compound DPAC in CDCl<sub>3</sub>.

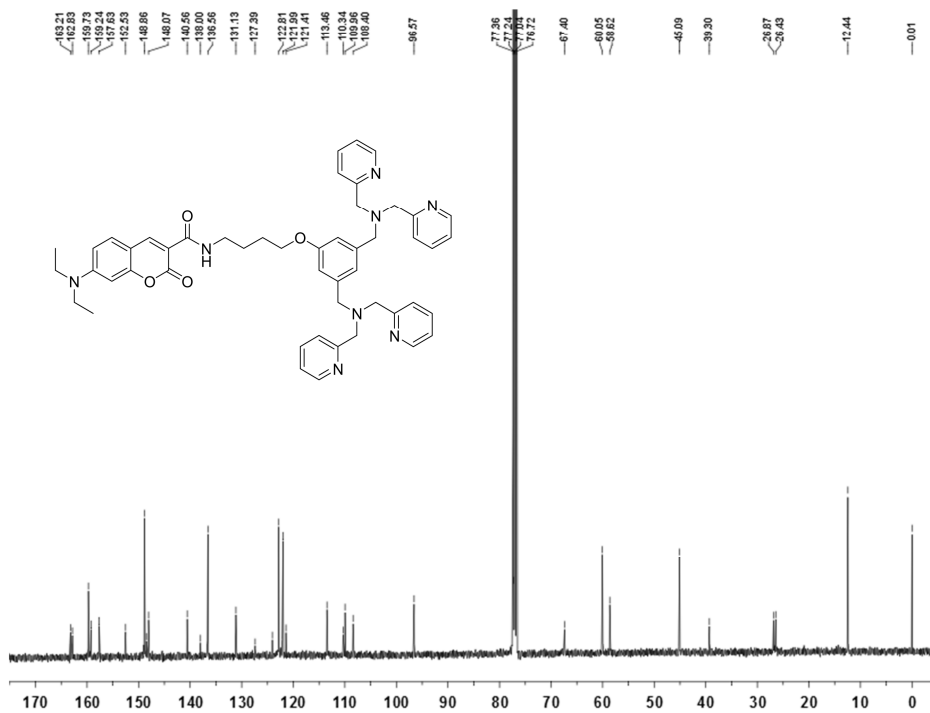

Figure S2. <sup>13</sup>C NMR of compound DPAC in CDCl<sub>3</sub>.

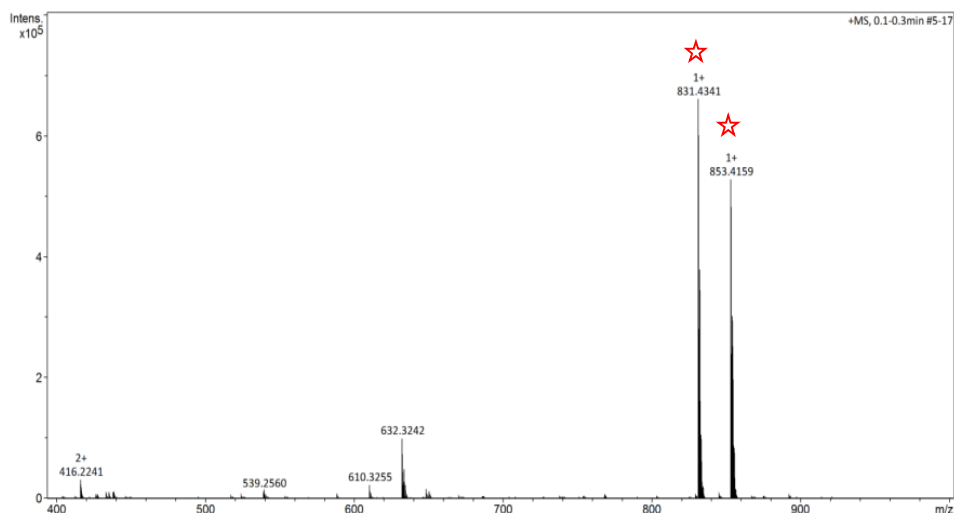

Figure S3. HRMS of compound **DPAC**.

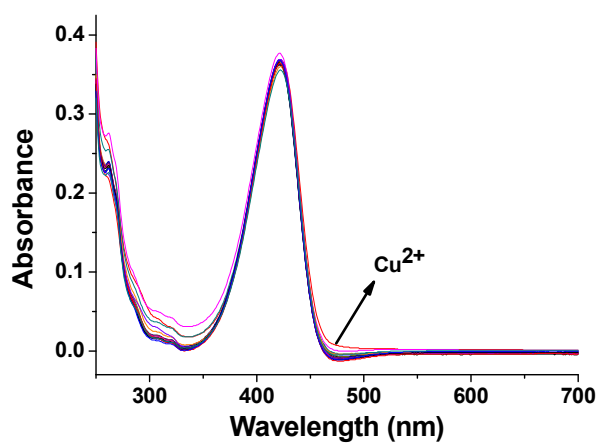

Figure S4. UV-vis absorption spectra of compound **DPAC** (10  $\mu$ M) upon addition of various metal ions (2 equivalents) in  $\text{CH}_3\text{CN}$ : HEPES (3: 2, v/v,  $\text{pH}=7.2$ ) solutions.

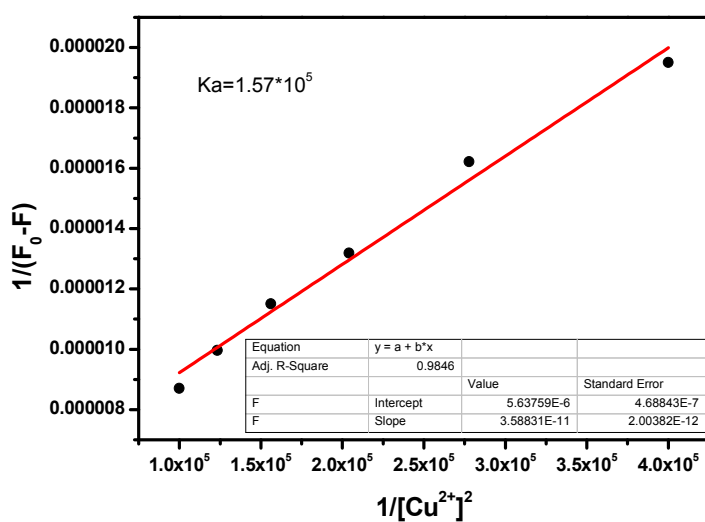

Figure S5. The Benesi-Hildebrand fitting of titration plots with the titration of  $\text{Cu}^{2+}$  assuming 1:2 stoichiometry with  $\text{Cu}^{2+}$ .

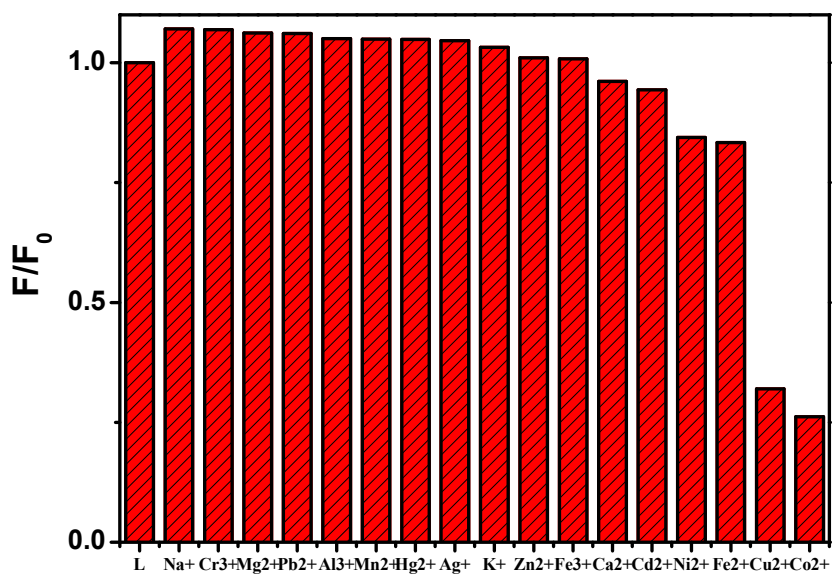

Figure S6. Emission responses of compound **DPAC** (10  $\mu\text{M}$ ) upon additions of various metal ions in  $\text{CH}_3\text{CN}$ : HEPES (3:2, v/v, pH=7.2) solution.

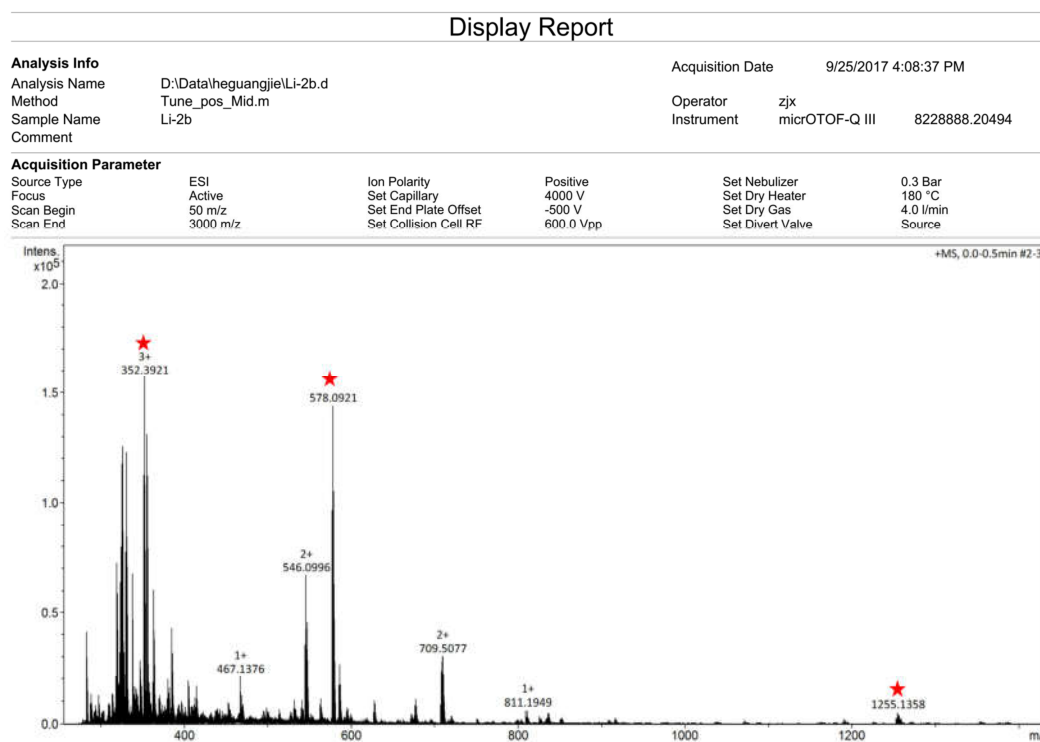

Figure S7. ESI-MS spectra of **DPAC** in the presence of  $\text{Cu}^{2+}$  in  $\text{CH}_3\text{CN}$  solution.

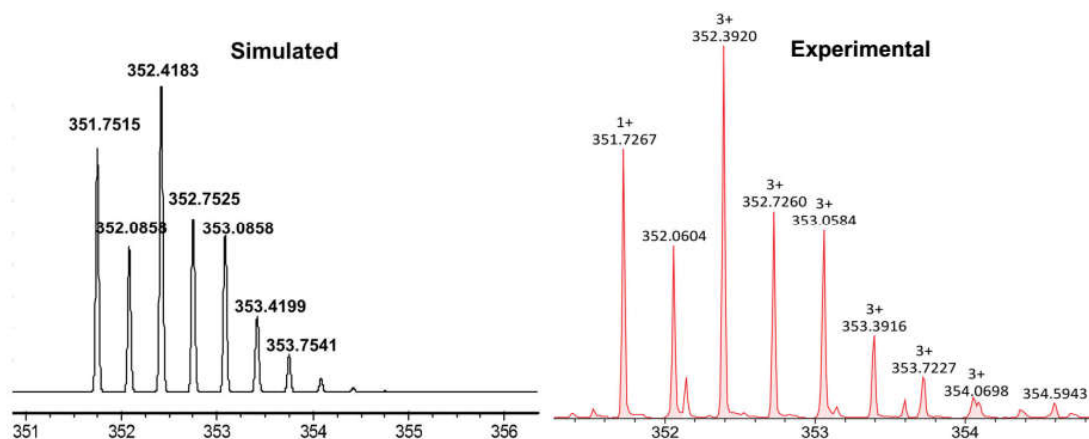

Figure S8. The simulated (left) and experimental (right) isotopic distributions of  $[\text{Cu}_2(\text{DPAC})+\text{ClO}_4]^{3+}$  species.

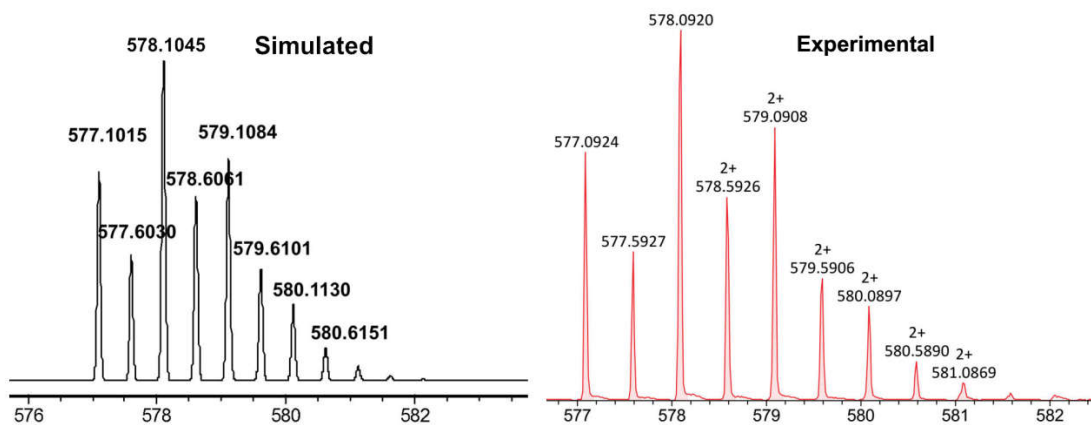

Figure S9. The simulated (left) and experimental (right) isotopic distributions of  $[\text{Cu}_2(\text{DPAC})+2\text{ClO}_4]^{2+}$  species.

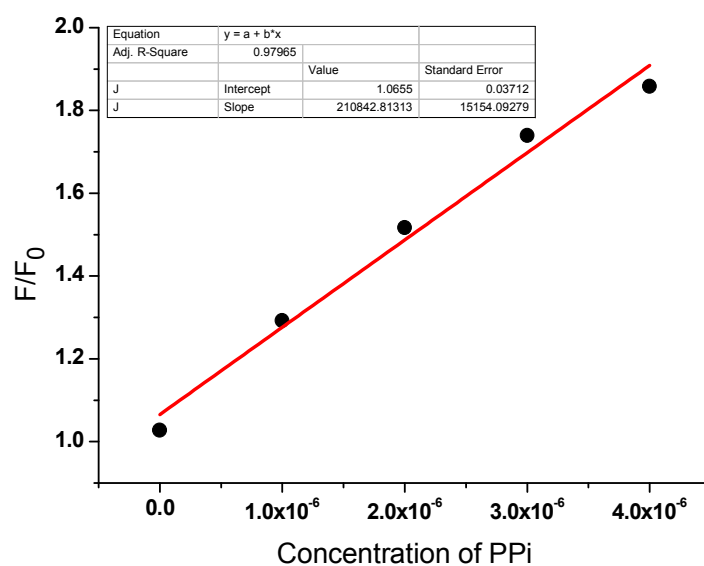

Figure S10. Fluorescence intensity of  $\text{DPAC-Cu}^{2+}$  ( $10 \mu\text{M}$ ) in  $\text{CH}_3\text{CN}$ : HEPES (3:2, v/v,  $\text{pH}=7.2$ ) solution upon additions of PPI in range of 1-4  $\mu\text{M}$ .

## Display Report

|                                                                                                                                       |                                                                                                      |
|---------------------------------------------------------------------------------------------------------------------------------------|------------------------------------------------------------------------------------------------------|
| <b>Analysis Info</b><br>Analysis Name: D:\Data\heguangjie\Li-Cu-ppi.d<br>Method: Tune_pos_Mid.m<br>Sample Name: Li-Cu-ppi<br>Comment: | Acquisition Date: 10/24/2017 4:20:54 PM<br>Operator: zjx<br>Instrument: micrOTOF-Q III 8228888.20494 |
|---------------------------------------------------------------------------------------------------------------------------------------|------------------------------------------------------------------------------------------------------|

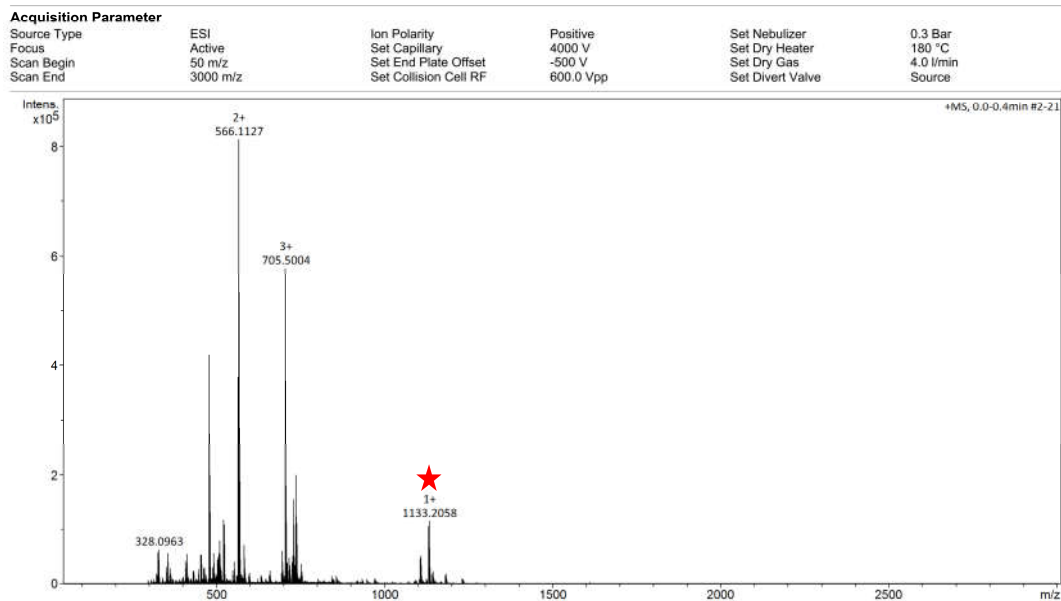

Figure S11. ESI-MS spectrum of **DPAC-Cu<sup>2+</sup>** with the addition of 1 equivalent of PPI.

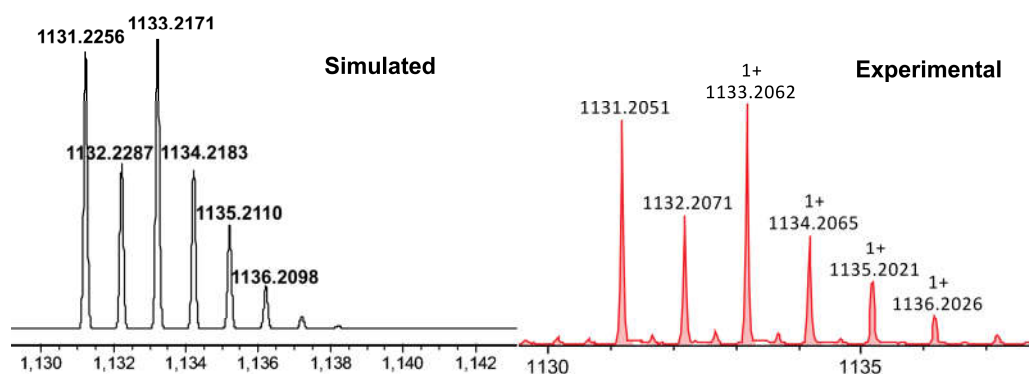

Figure S12. The simulated (left) and experimental (right) isotopic distributions of  $[\text{Cu}_2(\text{DPAC})+\text{PPI}+\text{H}]^+$  species.

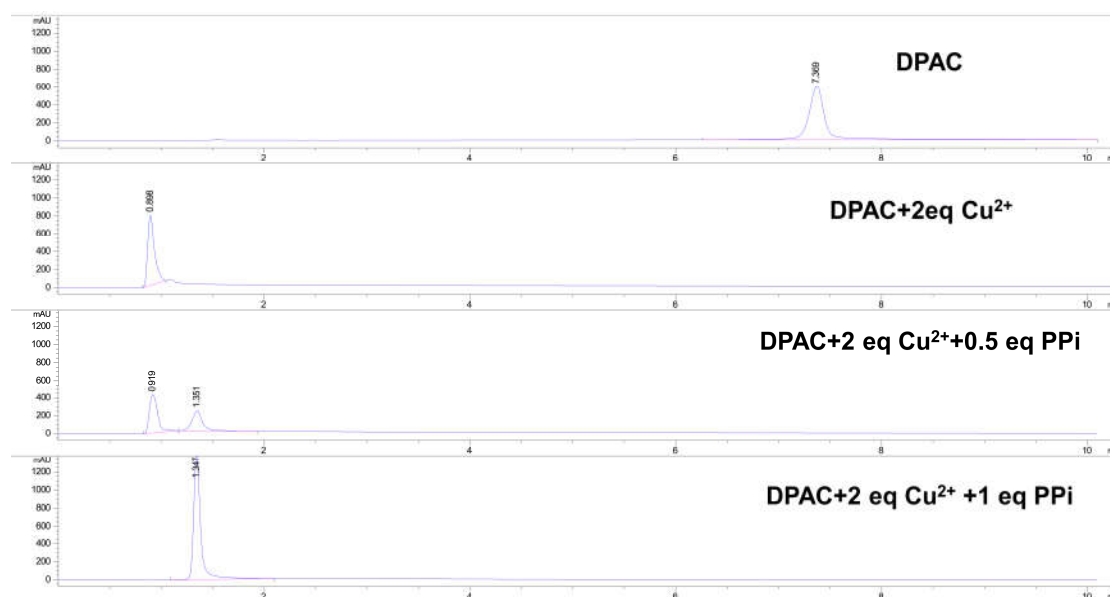

Figure S13. HPLC analyses of **DPAC**; **DPAC+2 equiv.Cu<sup>2+</sup>**; **DPAC+2 equiv.Cu<sup>2+</sup>+0.5 equiv. PPI**; **DPAC+2 equiv.Cu<sup>2+</sup>+1 equiv. PPI**. Liquid phase conditions: MeOH-water (8:2, v/v, mobile phase); 1.0 mL min<sup>-1</sup> (current velocity); ZORBAX SB-C18 (chromatographic column).

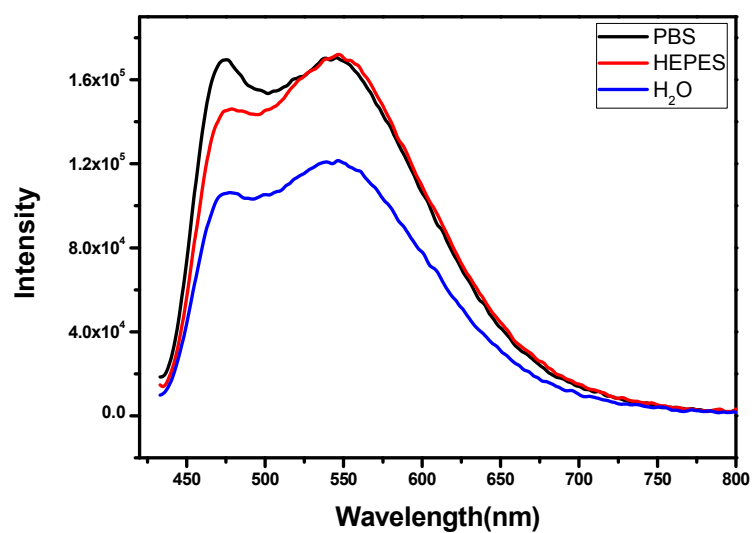

Figure S14. Fluorescence spectra of compound **DPAC** (10 μM) in different buffer solutions.
